# Supplementary material for: Network Analysis Reveals the Recognition Mechanism for Dimer Formation of Bulb-type Lectins
Source: PubMed Central journal article supplement (PMC5460271; doi:10.1038/s41598-017-03003-5), 2017-06-06
Supplement: 41598_2017_3003_MOESM1_ESM.pdf [file 41598_2017_3003_MOESM1_ESM.pdf]

## Supplementary Info

### Network Analysis Reveals the Recognition Mechanism for Dimer Formation of Bulb-type Lectins

Yunjie Zhao<sup>1,3†</sup>, Yiren Jian<sup>3†</sup>, Zhichao Liu<sup>3</sup>, Hang Liu<sup>4</sup>, Qin Liu<sup>5</sup>, Chanyou Chen<sup>5</sup>, Zhangyong Li<sup>2</sup>, Lu Wang<sup>2</sup>, H. Howie Huang<sup>4</sup> and Chen Zeng<sup>2,3,5\*</sup>

*Author affiliation:*

<sup>1</sup> Institute of Biophysics and Department of Physics, Central China Normal University, Wuhan 430079, China

<sup>2</sup> Research Center of Biomedical Engineering, Chongqing University of Posts and Telecommunications, Chongqing, China

<sup>3</sup> Department of Physics, The George Washington University, Washington, DC 20052, USA.

<sup>4</sup> Department of Electrical and Computer Engineering, The George Washington University, Washington, DC 20052, USA.

<sup>5</sup> School of Life Sciences, Jiangnan University, Wuhan 430056, China.

*\*Corresponding authors*

*Chen Zeng*

*Email: chenz@gwu.edu*

*Phone: +1-202-994-6481, Fax: +1-202-994-3001*

†These authors contributed equally to the paper as first authors.

**Table S1.** Representative plant homology sequences of chain A.

| <b>Species</b>             | <b>UniRef ID</b>        | <b>Pfam</b> | <b>SMART</b> |
|----------------------------|-------------------------|-------------|--------------|
| Allium                     | UniRef90_E7CG22_29_137  | PF01453     | SM00108      |
| Allium cepa                | UniRef90_Q679P2_1_109   | PF01453     | SM00108      |
| Allium sativum             | UniRef90_Q38787_37_144  | PF01453     | SM00108      |
| Allium sativum             | UniRef90_Q38787_187_295 | PF01453     | SM00108      |
| Allium sativum             | UniRef90_P92932_155_260 | PF01453     | SM00108      |
| Allium sativum             | UniRef90_P92932_13_125  | PF01453     | SM00108      |
| Allium sativum             | UniRef90_Q38783_29_137  | PF01453     | SM00108      |
| Allium triquetrum          | UniRef90_Q0R369_29_138  | PF01453     | SM00108      |
| Allium ursinum             | UniRef90_Q38725_28_135  | PF01453     | SM00108      |
| Allium ursinum             | UniRef90_Q24427_29_137  | PF01453     | SM00108      |
| Allium ursinum             | UniRef90_Q38724_22_128  | PF01453     | SM00108      |
| Alocasia macrorrhizos      | UniRef90_Q2LAE3_27_125  | PF01453     | SM00108      |
| Alocasia macrorrhizos      | UniRef90_Q2LAE3_146_247 | PF01453     | SM00108      |
| Aloe arborescens           | UniRef90_P49329_2_107   | PF01453     | SM00108      |
| Amaryllidoideae            | UniRef90_Q7Y1W7_25_130  | PF01453     | SM00108      |
| Amaryllis minuta           | UniRef90_Q6XCI6_27_134  | PF01453     | SM00108      |
| Ananas comosus             | UniRef90_Q8H2A4_24_129  | PF01453     | SM00108      |
| Arisaema amurense          | UniRef90_B1A014_147_248 | PF01453     | SM00108      |
| Arisaema amurense          | UniRef90_B1A014_28_126  | PF01453     | SM00108      |
| Arisaema lobatum           | UniRef90_Q6Q5X6_27_121  | PF01453     | SM00108      |
| Arisaema lobatum           | UniRef90_Q6Q5X6_148_250 | PF01453     | SM00108      |
| Arisaemateae               | UniRef90_E2ITD6_149_250 | PF01453     | SM00108      |
| Arisaemateae               | UniRef90_E2ITD6_28_122  | PF01453     | SM00108      |
| Arum maculatum             | UniRef90_Q38731_148_251 | PF01453     | SM00108      |
| Arum maculatum             | UniRef90_Q38731_28_122  | PF01453     | SM00108      |
| Bulbophyllum morphologorum | UniRef90_F8SK84_30_134  | PF01453     | SM00108      |
| Chimonanthus praecox       | UniRef90_A2SVT1_39_144  | PF01453     | SM00108      |
| Clivia miniata             | UniRef90_Q39542_32_136  | PF01453     | SM00108      |
| Clivia miniata             | UniRef90_Q39544_29_136  | PF01453     | SM00108      |
| Crinum asiaticum           | UniRef90_Q6SQE5_24_131  | PF01453     | SM00108      |
| Crocus                     | UniRef90_Q9FVA1_27_131  | PF01453     | SM00108      |
| Crocus                     | UniRef90_Q9FVA1_150_255 | PF01453     | SM00108      |
| Crocus vernus              | UniRef90_P86626_117_222 | PF01453     | SM00108      |
| Cymbidium hybrid cultivar  | UniRef90_Q39512_31_135  | PF01453     | SM00108      |
| Dendrobium                 | UniRef90_B2KNH9_26_135  | PF01453     | SM00108      |
| Dioscorea polystachya      | UniRef90_Q5W956_5_108   | PF01453     | SM00108      |
| Epipactis helleborine      | UniRef90_Q39728_27_131  | PF01453     | SM00108      |
| Epipactis helleborine      | UniRef90_Q39729_32_136  | PF01453     | SM00108      |
| Galanthus nivalis          | UniRef90_P30617_25_129  | PF01453     | SM00108      |
| Galanthus nivalis          | UniRef90_Q39904_21_128  | PF01453     | SM00108      |
| Galanthus nivalis          | UniRef90_Q39903_24_128  | PF01453     | SM00108      |

|                                                  |                         |         |         |
|--------------------------------------------------|-------------------------|---------|---------|
| <i>Galanthus nivalis</i>                         | UniRef90_Q945J7_24_129  | PF01453 | SM00108 |
| <i>Hernandia moerenhoutiana</i> subsp. samoensis | UniRef90_Q84RN0_1_93    | PF01453 | SM00108 |
| <i>Hippeastrum</i>                               | UniRef90_Q7Y041_26_133  | PF01453 | SM00108 |
| <i>Hippeastrum</i> sp.                           | UniRef90_Q39991_1_84    | PF01453 | SM00108 |
| <i>Hyacinthoides hispanica</i>                   | UniRef90_Q9ZP48_38_133  | PF01453 | SM00108 |
| <i>Hyacinthoides hispanica</i>                   | UniRef90_Q9ZP49_53_138  | PF01453 | SM00108 |
| <i>Hyacinthoides hispanica</i>                   | UniRef90_Q9ZP48_162_258 | PF01453 | SM00108 |
| <i>Lycoris radiata</i>                           | UniRef90_Q4W660_23_130  | PF01453 | SM00108 |
| <i>Lycoris</i> sp.                               | UniRef90_Q5MK12_24_129  | PF01453 | SM00108 |
| <i>Lysichiton camtschaticensis</i>               | UniRef90_H1A7C5_27_126  | PF01453 | SM00108 |
| <i>Lysichiton camtschaticensis</i>               | UniRef90_H1A7C5_155_255 | PF01453 | SM00108 |
| Magnoliophyta                                    | UniRef90_B4XS32_3_111   | PF01453 | SM00108 |
| <i>Monstera deliciosa</i>                        | UniRef90_A2IBI1_176_263 | PF01453 | SM00108 |
| <i>Monstera deliciosa</i>                        | UniRef90_A2IBI1_32_142  | PF01453 | SM00108 |
| <i>Narcissus hybrid cultivar</i>                 | UniRef90_Q40417_26_132  | PF01453 | SM00108 |
| <i>Narcissus hybrid cultivar</i>                 | UniRef90_Q40423_1_82    | PF01453 | SM00108 |
| <i>Narcissus tazetta</i>                         | UniRef90_C9W8B3_27_133  | PF01453 | SM00108 |
| <i>Pandanus amaryllifolius</i>                   | UniRef90_F8UZX3_32_132  | PF01453 | SM00108 |
| <i>Pinellia</i>                                  | UniRef90_D4P965_28_121  | PF01453 | SM00108 |
| <i>Pinellia</i>                                  | UniRef90_D4P965_147_248 | PF01453 | SM00108 |
| <i>Pinellia ternata</i>                          | UniRef90_H8Y197_148_249 | PF01453 | SM00108 |
| <i>Pinellia ternata</i>                          | UniRef90_H8Y197_28_121  | PF01453 | SM00108 |
| <i>Polygonatum cyrtonema</i>                     | UniRef90_Q8L568_30_135  | PF01453 | SM00108 |
| <i>Polygonatum multiflorum</i>                   | UniRef90_O24274_31_135  | PF01453 | SM00108 |
| <i>Polygonatum multiflorum</i>                   | UniRef90_O24273_33_128  | PF01453 | SM00108 |
| <i>Polygonatum roseum</i>                        | UniRef90_Q5EER7_30_134  | PF01453 | SM00108 |
| <i>Remusatia vivipara</i>                        | UniRef90_B5LYJ9_146_247 | PF01453 | SM00108 |
| <i>Remusatia vivipara</i>                        | UniRef90_B5LYJ9_29_120  | PF01453 | SM00108 |
| <i>Taxus x media</i>                             | UniRef90_Q56V23_27_136  | PF01453 | SM00108 |
| <i>Tulipa hybrid cultivar</i>                    | UniRef90_Q41625_51_155  | PF01453 | SM00108 |
| <i>Tulipa hybrid cultivar</i>                    | UniRef90_Q41622_21_126  | PF01453 | SM00108 |
| <i>Typhonium divaricatum</i>                     | UniRef90_Q6V8L5_36_141  | PF01453 | SM00108 |
| <i>Typhonium divaricatum</i>                     | UniRef90_A2ICN3_28_121  | PF01453 | SM00108 |
| <i>Typhonium divaricatum</i>                     | UniRef90_A2ICN3_147_250 | PF01453 | SM00108 |
| <i>Zantedeschia aethiopica</i>                   | UniRef90_Q6JTD2_25_130  | PF01453 | SM00108 |
| <i>Zephyranthes candida</i>                      | UniRef90_Q8LK14_28_134  | PF01453 | SM00108 |
| <i>Zingiber officinale</i>                       | UniRef90_B7U6V0_23_126  | PF01453 | SM00108 |

**Table S2.** Representative plant homology sequences of chain D.

| <b>Species</b>             | <b>UniRef ID</b>        | <b>Pfam</b> | <b>SMART</b> |
|----------------------------|-------------------------|-------------|--------------|
| Allium                     | UniRef90_E7CG22_29_137  | PF01453     | SM00108      |
| Allium cepa                | UniRef90_Q679P2_1_109   | PF01453     | SM00108      |
| Allium sativum             | UniRef90_Q38787_187_295 | PF01453     | SM00108      |
| Allium sativum             | UniRef90_Q38787_37_144  | PF01453     | SM00108      |
| Allium sativum             | UniRef90_P92932_155_260 | PF01453     | SM00108      |
| Allium sativum             | UniRef90_P92932_13_125  | PF01453     | SM00108      |
| Allium triquetrum          | UniRef90_Q0R369_29_138  | PF01453     | SM00108      |
| Allium ursinum             | UniRef90_Q38725_28_135  | PF01453     | SM00108      |
| Allium ursinum             | UniRef90_Q24427_29_137  | PF01453     | SM00108      |
| Allium ursinum             | UniRef90_Q38724_22_128  | PF01453     | SM00108      |
| Alocasia macrorrhizos      | UniRef90_Q2LAE3_146_249 | PF01453     | SM00108      |
| Alocasia macrorrhizos      | UniRef90_Q2LAE3_27_129  | PF01453     | SM00108      |
| Aloe arborescens           | UniRef90_P49329_2_107   | PF01453     | SM00108      |
| Amaryllidoideae            | UniRef90_Q7Y1W7_25_130  | PF01453     | SM00108      |
| Amaryllis minuta           | UniRef90_Q6XCI6_27_134  | PF01453     | SM00108      |
| Ananas comosus             | UniRef90_Q8H2A4_24_129  | PF01453     | SM00108      |
| Arisaema amurense          | UniRef90_B1A014_147_250 | PF01453     | SM00108      |
| Arisaema amurense          | UniRef90_B1A014_25_130  | PF01453     | SM00108      |
| Arisaema lobatum           | UniRef90_Q6Q5X6_27_130  | PF01453     | SM00108      |
| Arisaema lobatum           | UniRef90_Q6Q5X6_148_252 | PF01453     | SM00108      |
| Arisaemateae               | UniRef90_E2ITD6_149_252 | PF01453     | SM00108      |
| Arisaemateae               | UniRef90_E2ITD6_28_131  | PF01453     | SM00108      |
| Arum maculatum             | UniRef90_Q38731_28_129  | PF01453     | SM00108      |
| Arum maculatum             | UniRef90_Q38731_148_253 | PF01453     | SM00108      |
| Bulbophyllum morphologorum | UniRef90_F8SK84_30_134  | PF01453     | SM00108      |
| Chimonanthus praecox       | UniRef90_A2SVT1_39_144  | PF01453     | SM00108      |
| Clivia miniata             | UniRef90_Q39542_32_136  | PF01453     | SM00108      |
| Clivia miniata             | UniRef90_Q39544_29_135  | PF01453     | SM00108      |
| Crinum asiaticum           | UniRef90_Q6SQE5_24_131  | PF01453     | SM00108      |
| Crocus                     | UniRef90_Q9FVA1_150_255 | PF01453     | SM00108      |
| Crocus                     | UniRef90_Q9FVA1_27_131  | PF01453     | SM00108      |
| Crocus vernus              | UniRef90_P86626_117_222 | PF01453     | SM00108      |
| Cymbidium hybrid cultivar  | UniRef90_Q39512_31_135  | PF01453     | SM00108      |
| Dendrobium                 | UniRef90_B2KNH9_26_135  | PF01453     | SM00108      |
| Dioscorea polystachya      | UniRef90_Q5W956_5_108   | PF01453     | SM00108      |
| Epipactis helleborine      | UniRef90_Q39728_27_131  | PF01453     | SM00108      |
| Epipactis helleborine      | UniRef90_Q39729_40_136  | PF01453     | SM00108      |
| Galanthus nivalis          | UniRef90_P30617_25_129  | PF01453     | SM00108      |
| Galanthus nivalis          | UniRef90_Q39903_24_128  | PF01453     | SM00108      |
| Galanthus nivalis          | UniRef90_Q39904_21_127  | PF01453     | SM00108      |
| Galanthus nivalis          | UniRef90_Q945J7_24_129  | PF01453     | SM00108      |

|                                           |                         |         |         |
|-------------------------------------------|-------------------------|---------|---------|
| Hernandia moerenhoutiana subsp. samoensis | UniRef90_Q84RN0_1_93    | PF01453 | SM00108 |
| Hippeastrum                               | UniRef90_Q7Y041_26_132  | PF01453 | SM00108 |
| Hippeastrum sp.                           | UniRef90_Q39991_1_83    | PF01453 | SM00108 |
| Hyacinthoides hispanica                   | UniRef90_Q9ZP48_38_133  | PF01453 | SM00108 |
| Hyacinthoides hispanica                   | UniRef90_Q9ZP49_53_140  | PF01453 | SM00108 |
| Hyacinthoides hispanica                   | UniRef90_Q9ZP48_162_258 | PF01453 | SM00108 |
| Listera ovata                             | UniRef90_Q40233_29_134  | PF01453 | SM00108 |
| Listera ovata                             | UniRef90_Q40231_31_136  | PF01453 | SM00108 |
| Listera ovata                             | UniRef90_Q40232_39_135  | PF01453 | SM00108 |
| Lycoris radiata                           | UniRef90_Q4W660_23_129  | PF01453 | SM00108 |
| Lycoris sp.                               | UniRef90_Q5MK12_24_129  | PF01453 | SM00108 |
| Lysichiton camtschatcensis                | UniRef90_H1A7C5_27_125  | PF01453 | SM00108 |
| Lysichiton camtschatcensis                | UniRef90_H1A7C5_155_257 | PF01453 | SM00108 |
| Magnoliophyta                             | UniRef90_B4XS32_3_111   | PF01453 | SM00108 |
| Monstera deliciosa                        | UniRef90_A2IBI1_155_263 | PF01453 | SM00108 |
| Monstera deliciosa                        | UniRef90_A2IBI1_32_142  | PF01453 | SM00108 |
| Narcissus hybrid cultivar                 | UniRef90_Q40423_1_82    | PF01453 | SM00108 |
| Narcissus hybrid cultivar                 | UniRef90_Q40417_26_131  | PF01453 | SM00108 |
| Narcissus tazetta                         | UniRef90_C9W8B3_27_132  | PF01453 | SM00108 |
| Pandanus amaryllifolius                   | UniRef90_F8UZX3_30_132  | PF01453 | SM00108 |
| Pinellia                                  | UniRef90_D4P965_30_130  | PF01453 | SM00108 |
| Pinellia                                  | UniRef90_D4P965_147_250 | PF01453 | SM00108 |
| Pinellia ternata                          | UniRef90_H8Y197_148_251 | PF01453 | SM00108 |
| Pinellia ternata                          | UniRef90_H8Y197_28_130  | PF01453 | SM00108 |
| Polygonatum cyrtoneura                    | UniRef90_Q8L568_30_135  | PF01453 | SM00108 |
| Polygonatum multiflorum                   | UniRef90_Q24274_31_135  | PF01453 | SM00108 |
| Polygonatum roseum                        | UniRef90_Q5EER7_30_134  | PF01453 | SM00108 |
| Remusatia vivipara                        | UniRef90_B5LYJ9_146_249 | PF01453 | SM00108 |
| Remusatia vivipara                        | UniRef90_B5LYJ9_29_129  | PF01453 | SM00108 |
| Taxus x media                             | UniRef90_Q56V23_27_136  | PF01453 | SM00108 |
| Tulipa hybrid cultivar                    | UniRef90_Q41625_51_155  | PF01453 | SM00108 |
| Tulipa hybrid cultivar                    | UniRef90_Q41622_21_128  | PF01453 | SM00108 |
| Typhonium divaricatum                     | UniRef90_Q6V8L5_36_141  | PF01453 | SM00108 |
| Typhonium divaricatum                     | UniRef90_A2ICN3_28_130  | PF01453 | SM00108 |
| Typhonium divaricatum                     | UniRef90_A2ICN3_147_250 | PF01453 | SM00108 |
| Wolffia arrhiza                           | UniRef90_E2ICK0_24_129  | PF01453 | SM00108 |
| Wolffia australiana                       | UniRef90_F8SVT9_25_133  | PF01453 | SM00108 |
| Zantedeschia aethiopica                   | UniRef90_Q6JTD2_25_130  | PF01453 | SM00108 |
| Zephyranthes candida                      | UniRef90_Q8LK14_28_133  | PF01453 | SM00108 |
| Zingiber officinale                       | UniRef90_B7U6V0_23_126  | PF01453 | SM00108 |

**Table S3.** Interface residues on the lectin protein dimer structure (PDB code: 1KJ1). The interface area was defined by the area of the accessible surface on both partners that becomes inaccessible to solvent due to protein-protein interactions. The conservation scores were calculated by ConSurf program.

| Chain | Residue | Conservation | Chain | Residue | Conservation |
|-------|---------|--------------|-------|---------|--------------|
| A     | THR5    | 1            | D     | ASN2    | 9            |
| A     | VAL40   | 4            | D     | MET5    | 1            |
| A     | GLU91   | 2            | D     | ASP92   | 8            |
| A     | ASP92   | 8            | D     | ASN94   | 8            |
| A     | ASN94   | 7            | D     | TYR98   | 9            |
| A     | TYR98   | 8            | D     | GLY99   | 8            |
| A     | GLY99   | 8            | D     | ASP101  | 7            |
| A     | ASP101  | 6            | D     | ILE102  | 5            |
| A     | ILE102  | 5            | D     | TRP103  | 7            |
| A     | TRP103  | 6            | D     | SER104  | 7            |
| A     | SER104  | 8            | D     | THR105  | 9            |
| A     | THR105  | 9            | D     | THR107  | 9            |
| A     | THR107  | 9            |       |         |              |

**Table S4.** Mannose specific binding residues on the lectin protein structure (PDB code: 1KJ1). The mannose binding residues were calculated by protein-ligand interaction recognition program LIGPLOT. The conservation scores were calculated by ConSurf program.

| <b>Mannose</b> | <b>Chain</b> | <b>Residue</b> | <b>Conservation</b> | <b>Mannose</b> | <b>Chain</b> | <b>Residue</b> | <b>Conservation</b> |
|----------------|--------------|----------------|---------------------|----------------|--------------|----------------|---------------------|
| MAN301         | A            | ASP60          | 5                   | MAN300         | A            | GLN90          | 8                   |
| MAN301         | A            | ASN62          | 7                   | MAN300         | A            | ASP92*         | 8                   |
| MAN301         | A            | TYR66          | 3                   | MAN300         | A            | ASN94*         | 7                   |
| MAN301         | A            | HIS77          | 4                   | MAN300         | A            | TYR98*         | 8                   |
| MAN301         | A            | VAL79          | 1                   | MAN300         | D            | ASN84          | 4                   |
| MAN302         | A            | GLN26          | 8                   | MAN300         | D            | ASP101*        | 7                   |
| MAN302         | A            | ASP28          | 9                   | MAN303         | A            | TYR21          | 5                   |
| MAN302         | A            | ASN30          | 9                   | MAN303         | A            | ASP35          | 2                   |
| MAN302         | A            | TYR34          | 8                   | MAN303         | A            | VAL40          | 4                   |
| MAN302         | A            | SER39          | 1                   | MAN303         | A            | GLY93          | 6                   |
| MAN305         | D            | GLN58          | 7                   | MAN303         | D            | THR107*        | 9                   |
| MAN305         | D            | ASP60          | 5                   | MAN303         | D            | LYS109         | 5                   |
| MAN305         | D            | ASN62          | 7                   | MAN304         | A            | ASN84          | 4                   |
| MAN305         | D            | TYR66          | 4                   | MAN304         | A            | ASP101*        | 6                   |
| MAN305         | D            | SER72          | 3                   | MAN304         | A            | TYR108         | 6                   |
| MAN306         | D            | GLN26          | 8                   | MAN304         | D            | GLN90          | 8                   |
| MAN306         | D            | ASP28          | 9                   | MAN304         | D            | ASP92*         | 8                   |
| MAN306         | D            | ASN30          | 9                   | MAN304         | D            | ASN94*         | 8                   |
| MAN306         | D            | TYR34          | 8                   | MAN304         | D            | TYR98*         | 9                   |
| MAN306         | D            | ASP46          | 4                   |                |              |                |                     |

The mannose (MAN) specific binding residues are identified by using LigPlus.

The left column shows the mannose interacts with only one chain (Chain A or Chain D).

The right column shows the mannose interacts with both chain A and Chain D.

The residues at interface area are labeled with \*.

**Table S5.** Surface residues on the lectin protein dimer structure (PDB code: 1KJ1). The solvent accessible surface areas were calculated by GETAREA. The conservation scores were calculated by ConSurf program.

| Chain | Residue | Conservation | Chain | Residue | Conservation |
|-------|---------|--------------|-------|---------|--------------|
| A     | GLY7    | 5            | D     | ASP7    | 5            |
| A     | TYR11   | 1            | D     | TYR11   | 1            |
| A     | GLY13   | 5            | D     | GLY13   | 6            |
| A     | GLN14   | 4            | D     | GLU19   | 2            |
| A     | ASP17   | 1            | D     | GLU27   | 1            |
| A     | GLU19   | 2            | D     | HIS36   | 1            |
| A     | GLU27   | 1            | D     | SER37   | 5            |
| A     | HIS36   | 1            | D     | THR38   | 1            |
| A     | SER37   | 3            | D     | ALA39   | 3            |
| A     | THR38   | 1            | D     | ASN44   | 7            |
| A     | ASN44   | 6            | D     | ILE47   | 6            |
| A     | ILE47   | 6            | D     | PRO48   | 1            |
| A     | LEU48   | 1            | D     | GLY49   | 6            |
| A     | GLY49   | 5            | D     | LYS51   | 2            |
| A     | LYS51   | 1            | D     | ALA68   | 1            |
| A     | SER59   | 3            | D     | GLU69   | 1            |
| A     | ALA68   | 1            | D     | GLY70   | 1            |
| A     | GLU69   | 1            | D     | ARG71   | 1            |
| A     | GLY70   | 5            | D     | HIS77   | 3            |
| A     | ARG71   | 1            | D     | VAL79   | 1            |
| A     | SER72   | 2            | D     | ARG80   | 3            |
| A     | ARG80   | 4            | D     | ASN82   | 2            |
| A     | ASN82   | 3            | D     | GLU91   | 3            |
| A     | SER100  | 2            | D     | ASN106  | 4            |
| A     | GLY106  | 5            | D     | TYR108  | 3            |
| A     | LYS109  | 5            |       |         |              |



**Table S6.** The direct coupling analysis scores of the interface interactions.

| Chain A |              | Chain D |              | DI              | DI              |
|---------|--------------|---------|--------------|-----------------|-----------------|
| Residue | Conservation | Residue | Conservation | (single domain) | (double domain) |
| GLU91   | 2            | MET5    | 1            | 0.8             | 0.6             |
| ASN94   | 7            | THR105  | 9            | 0.2             | 0.1             |
| ASN94   | 7            | THR107  | 9            | 0.2             | 0.5             |
| TYR98   | 8            | TYR98   | 9            | 0.8             | 0.3             |
| TYR98   | 8            | ASP101  | 6            | 0.1             | 0.1             |
| GLY99   | 7            | GLY99   | 7            | 1.37            | 0.6             |
| GLY99   | 7            | ILE102  | 5            | 0.3             | 0.1             |
| ASP101  | 6            | TYR98   | 9            | 0.1             | 0.1             |
| ILE102  | 5            | GLY99   | 7            | 0.3             | 0.2             |
| SER104  | 8            | ASN94   | 8            | 0.1             | 0.3             |
| THR105  | 9            | ASN94   | 8            | 0.1             | 0.7             |
| THR107  | 9            | ASP92   | 8            | 0.1             | 0.1             |
| THR107  | 9            | ASN94   | 8            | 0.1             | 0.3             |

**Table S7.** The comparison analysis between single- and double-domain lectin proteins. The residues of position 5 and 91 are important for interaction in single-domain proteins.

| PDB  | Organism              | Single/Double | Position 5 | Surface residue | Position 91 | Surface residue | RMSD (Å) |
|------|-----------------------|---------------|------------|-----------------|-------------|-----------------|----------|
| 1MSA | Snowdrop              | Single        | TYR        | +               | LYS         | +               | 1.42     |
| 3A0C | Polygonatum cyrtonema | Single        | SER        | +               | GLN         | +               | 1.65     |
| 3MEZ | Crocus vernus         | Double        | LEU        | -               | PRO         | -               | 3.17     |
| 3R0E | Abrus precatorius     | Double        | TYR        | -               | PRO         | -               | 5.77     |

"+" surface residue

"-" not surface residue

Hydrophobic residues are highlighted in red

RMSDs were calculated between 1KJ1 and selected proteins

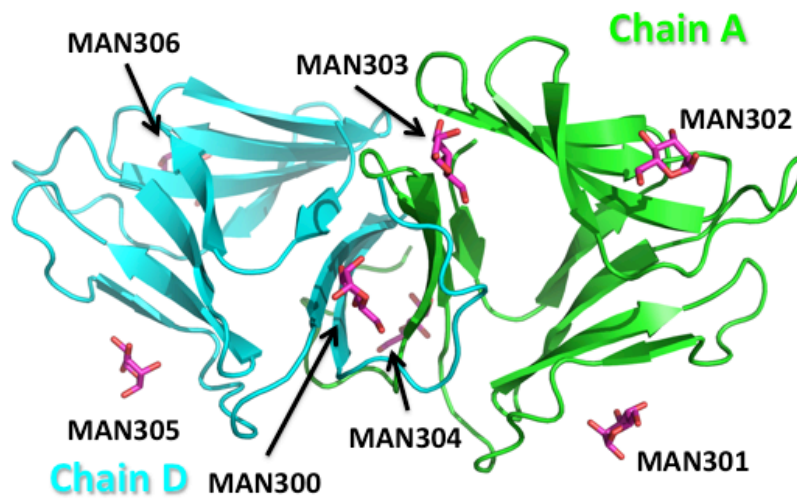

**Figure S1. The cartoon structure of garlic lectin dimer protein.** The chain A, chain D, and mannoses are colored in green, cyan, and purple, respectively.

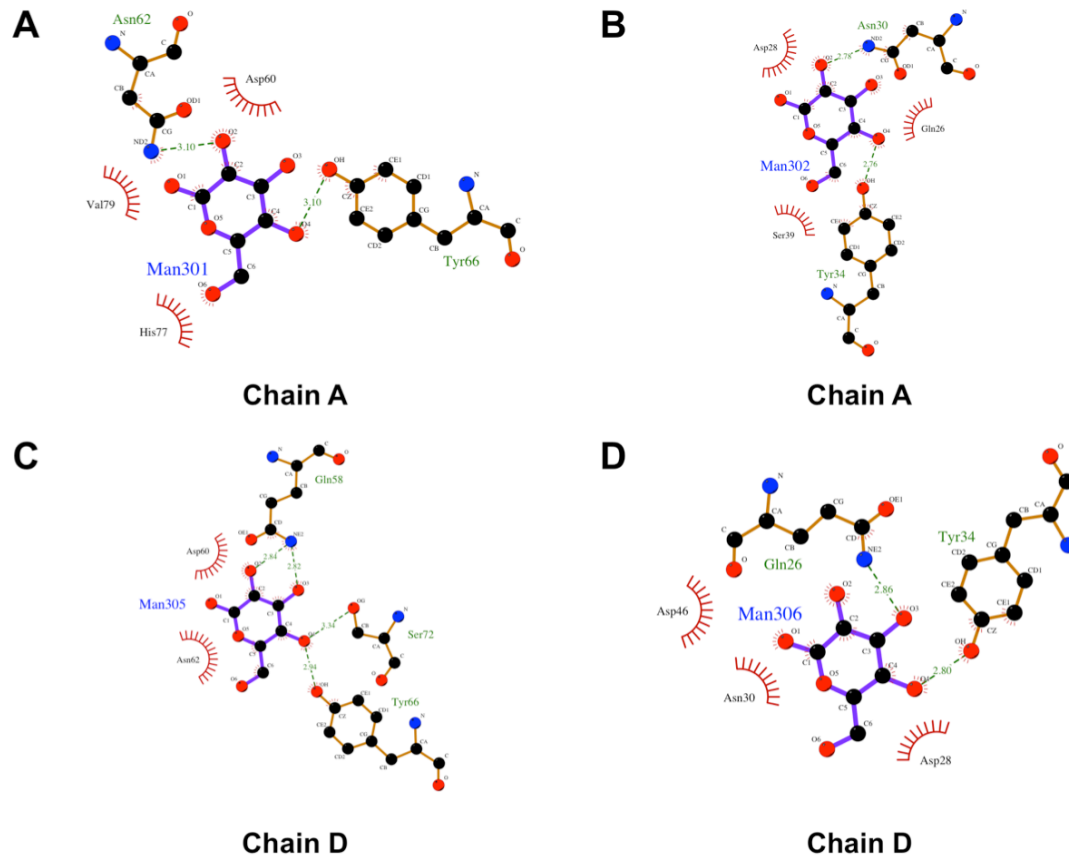

**Figure S2. Mannose binding residues.** The mannose specific binding residues were identified by using LIGPLOT. The mannose specific binding residues are listed in Table S4.

## Single Domain

>1KJ1

RNLLTNGEGLYAGQSLDVEPYHFIMQEDCNLVLYDHSTSVWASNTGILGKKGCKAVLQ  
SDGNFVYDAEGRSLWASHSVRGNNGNYVLVLQEDGNVVIYGSDIWSTGTYKRNILMN  
DEGLYAGQSLDVEPYHLIMQEDCNLVLYDHSTAVWTTNTDIPGKKGCKAVLQSDGNFV  
VYDAEGRSLWASHSVRGNNGNYVLVLQEDGNVVIYGSDIWSTNTYK

>UniRef90\_A2SVT1

NVLYSPEKLNPGDSLKNGGYSVMHRGCNLVLYDNSEAIWSSNTNGQGTNCYCTMQR  
DGNFVLYSSQGS AIWSSKTWQGGSSHYVLVLQNDRNLVIIYGPSRWATETNVLYSPEKL  
NPGDSLKNGGYSVMHRGCNLVLYDNSEAIWSSNTNGQGTNCYCTMQRDGNFVLYSS  
QGS AIWSSKTWQGGSSHYVLVLQNDRNLVIIYGPSRWATET

>UniRef90\_B2KNH9

NHLLPGERLNPGNFLKQDRYMLIMQEDCNLVLYNLNKPEWATKTANQGSRCFVTLQSD  
GNFVIYDEHEQEGRNEAIWASKTDGENGNVYIILQKDGNLVLYSKPIFATGTNHLLPGER  
LNPGNFLKQDRYMLIMQEDCNLVLYNLNKPEWATKTANQGSRCFVTLQSDGNFVIYDE  
HEQEGRNEAIWASKTDGENGNVYIILQKDGNLVLYSKPIFATGT

>UniRef90\_B4XS32

RNLLTNGEGLYAGQSLDVEQYKFIMQDDCNLVLYEYSTPIWASNTGVTGKNGCRAVM  
QRDGNFVYDVNDRPVWASNSVRGNNGNYILVLQKDRNVVIYESDIWSTGTYRRNLLTN  
GEGLYAGQSLDVEQYKFIMQDDCNLVLYEYSTPIWASNTGVTGKNGCRAVMQRDGNF  
VYDVNDRPVWASNSVRGNNGNYILVLQKDRNVVIYESDIWSTGTYR

>UniRef90\_B7U6V0

NVLYSGDTLSSGQSLTQGSYSLTMQSDCNLVLYDYGRAVWSSGTYNRGYNCVLRMQN  
DGNLVIIYSNNNAIWASNTGGQQGYFVLILQRDRDVVIYGCPSWATGTNVLYSGDTLSSG  
QSLTQGSYSLTMQSDCNLVLYDYGRAVWSSGTYNRGYNCVLRMQNDGNLVIIYSNNNA  
IWASNTGGQQGYFVLILQRDRDVVIYGCPSWATGT

>UniRef90\_C9W8B3

NILYSGETLSPGEFLNYGRYIFIMQEDCNLVLYDVKPIWATNTGGLARDCHLNMQSDG  
NLVVYSQTNDPIWASNTGGGENGNVYCVLQKDRNVVIYGTARWATGTYTNILYSGETLS  
PGEFLNYGRYIFIMQEDCNLVLYDVKPIWATNTGGLARDCHLNMQSDGNLVVYSQTND  
PIWASNTGGGENGNVYCVLQKDRNVVIYGTARWATGTYT

>UniRef90\_E2ICK0

RNVLFSGERLFAGDSLVLGNYVLTMQGDCNLVIFYAPAAIWSSGTFNRGYNCYATLLNN  
GYFVYDYGAGTPLWWAGRNTGTGYIILLENRNIVLYGPARWVSGTYRNVLFSGERL  
FAGDSLVLGNYVLTMQGDCNLVIFYAPAAIWSSGTFNRGYNCYATLLNNGYFVYDGA  
GTPLWWAGRNTGTGYIILLENRNIVLYGPARWVSGTY

>UniRef90\_E7CG22

RNILLNGEGLYAGQSLVIEQYTFIMQDDCNLVLYEYSTPIWASNTGITGKNGCRAVMQA  
DGNFVYDFKGRAVWASNSRRGNGNYILVLQEDRNVIYGS DIWSTGTYRRNILLNGE  
GLYAGQSLVIEQYTFIMQDDCNLVLYEYSTPIWASNTGITGKNGCRAVMQADGNFVY  
DFKGRAVWASNSRRGNGNYILVLQEDRNVIYGS DIWSTGTYR

>UniRef90\_F8SK84

NHLLSGEQLNTGQSLTEGTSQFIIQDDCNLVLYKMNIWKWQSNTTGE GSGCYVTFNKQG  
NLVIHNNKNRVIWSSNSSRKQGNVYIILQKDGNLVIYSKPIWATGTNHLLSGEQLNTGQS

LTEGTSQFIIQDDCNLVLYKMNIVKWQSNTTGEESGSGCYVTFNKQGNLVIHNNKNRVIWS  
SNSSRKQGNYLILQKDGNLVIYSKPIWATGT

>UniRef90\_F8SVT9

RTTLSSGESLNAPHSLHTGNYVFTMQNDCNLVLYDRDRAVWSTRTHGQGQOCRATMQ  
SDGNFVVYDNRNRALWASGTHRPTSGFYILILQADRNVVIYHAGRATWATGTRTTLSSG  
ESLNAPHSLHTGNYVFTMQNDCNLVLYDRDRAVWSTRTHGQGQOCRATMQSDGNFV  
VYDNRNRALWASGTHRPTSGFYILILQADRNVVIYHAGRATWATGT

>UniRef90\_F8UZX3

SGESLQTNQYLESGPYRFIMQGDCNLVLYVNKTRALWSSRTNGQGTACNATLQNNGNL  
VVLSGSNVWTSNSARGPNNYRLIVQSDGNVVIYGAALWATNTSGESLQTNQYLESGP  
YRFIMQGDCNLVLYVNKTRALWSSRTNGQGTACNATLQNNGNL VVLSGSNVWTSNS  
ARGPNNYRLIVQSDGNVVIYGAALWATNT

>UniRef90\_O24274

NSLTSPNSLPSGHSNTGSYRLIMQADCNLVYVYDSGKPVWATNTGGLARDCRLTMHNN  
GNLVIYDRSNSVIWQTNTNEKEDHYVLVLQQDRNVVIYGPAVWATGSNSLTSPNSLPSG  
HSLNTGSYRLIMQADCNLVYVYDSGKPVWATNTGGLARDCRLTMHNNGNLVIYDRSNS  
VIWQTNTNEKEDHYVLVLQQDRNVVIYGPAVWATGS

>UniRef90\_O24427

RNILLNGEGLYAGQSLEEGSYKLIMQDDCNLVLFYESTQVWASNTGVSGRNGCRAVMQ  
ADGNFVVYDSNSRAVWASQSRRGNGNYILALQEDRNVVIYGTDIWSTGTYYRRNILLNG  
EGLYAGQSLEEGSYKLIMQDDCNLVLFYESTQVWASNTGVSGRNGCRAVMQADGNFV  
VYDSNSRAVWASQSRRGNGNYILALQEDRNVVIYGTDIWSTGTYYR

>UniRef90\_P30617

NILYSGETLSTGEFLNYGSFVFMQEDCNLVLYDVKPIWATNTGGLSRSCFLSMQTDG  
NLVVYNPSNKPWASNTGGQNGNYVCILQKDRNVVIYGTDRWATGTNILYSGETLSTGE  
FLNYGSFVFMQEDCNLVLYDVKPIWATNTGGLSRSCFLSMQTDGNLVVYNPSNKPW  
ASNTGGQNGNYVCILQKDRNVVIYGTDRWATGT

>UniRef90\_P49329

NILYSSEVLHENQYISYGPYEFIMQHDCNLVLYESGNPTWASNTGGLALHCRATLQTDG  
NLVVQNSANRIIWSNTGTGTNGDYLLVLQKNGNVVIVGPPWATGTNILYSSEVLHEN  
QYISYGPYEFIMQHDCNLVLYESGNPTWASNTGGLALHCRATLQTDGNLVVQNSANRII  
WQNTGTGTNGDYLLVLQKNGNVVIVGPPWATGT

>UniRef90\_Q0R369

RNILLNGEGLYAGQSLEEGPYRLAMQDDCNLVLYDEYSRPVWASNTGVTGRNGCRAV  
MQADGNFVVYDSNSRAVWASNSRKGNNGNYILVLQKDRNAVVIYGSDIWSTGTYYRRNILL  
NGEGLYAGQSLEEGPYRLAMQDDCNLVLYDEYSRPVWASNTGVTGRNGCRAVMQAD  
GNFVVYDSNSRAVWASNSRKGNNGNYILVLQKDRNAVVIYGSDIWSTGTYYR

>UniRef90\_Q38724

RNILGNEQALYADQSLDEGPKYKLIMQKDCNLVLFHNTVRWATKTGSLGHYECYALM  
QSDGNFVVHNRNGAIVWASNSRRGNGEYVVLVRENGNVVIYGSDIWSTGTRNILGNEQ  
ALYADQSLDEGPKYKLIMQKDCNLVLFHNTVRWATKTGSLGHYECYALMQSDGNFVV  
HNRNGAIVWASNSRRGNGEYVVLVRENGNVVIYGSDIWSTGT

>UniRef90\_Q38725

RNLLGNGEGLYAGQSLEEGPYKLIMQEDCNLVLYEHSTPVWATNTGVTGRNGCKAVM  
QADGNFVVYDSNGRAVWASNSIKGNNGNYILVLQNDNRNVVIYGSDIWSTGTYYRNLLGNG

EGLYAGQSLEEGPYKLIMQEDCNLVLYEHSTPVWATNTGVTGRNGCKAVMQADGNFV  
VYDSNGRAVWASNSIKGNGNYILVLQNDRNVVIYGSDIWSTGTY

>UniRef90\_Q38783

RNILMNDEGLYAGQSLDVEPYHLIMQEDCNLVLYDHSTAVWTSNTDIPGKKGCKAVLQ  
SDGNFVVYDAEGRSLWASHSVRGNNGNYVLVLQEDGNVVIYGSDIWSTNTYKRNILMN  
DEGLYAGQSLDVEPYHLIMQEDCNLVLYDHSTAVWTSNTDIPGKKGCKAVLQSDGNFV  
VYDAEGRSLWASHSVRGNNGNYVLVLQEDGNVVIYGSDIWSTNTYK

>UniRef90\_Q39512

NHLLSGERLNPQSLTSGNVDLAMQYDCNLVLYDNGKSIWSSGTYGSGSGCYVTLQTD  
GNLVIYDNTNNPLWASNTSGENGNYLILQKDRNLVIYSHPIWATGTNHLLSGERLNPQ  
SLTSGNVDLAMQYDCNLVLYDNGKSIWSSGTYGSGSGCYVTLQTDGNLVIYDNTNNPL  
WASNTSGENGNYLILQKDRNLVIYSHPIWATGT

>UniRef90\_Q39542

NILYSGETLSPGESLTYGRYDFIIQEDCNLVLYDVKPIWATNTGGVSSGCHLSMQTDGN  
LVVYSPKNNPIWASNTEGENGNVVCVLQKDRNVVIYGTASWATGTNILYSGETLSPGES  
LTYGRYDFIIQEDCNLVLYDVKPIWATNTGGVSSGCHLSMQTDGNLVVYSPKNNPIW  
ASNTEGENGNVVCVLQKDRNVVIYGTASWATGT

>UniRef90\_Q39544

NILYSGETLSPGESLSHGRYVFIMQEDCNLVLYDVDRPIWATNTGGISHGCHLSMQADG  
NLVVYSQRNNPIWASNTGGENDANYVLILQKDRNVVIYGPARGATGTNTNILYSGETLS  
PGESLSHGRYVFIMQEDCNLVLYDVDRPIWATNTGGISHGCHLSMQADGNLVVYSQRN  
NPIWASNTGGENDANYVLILQKDRNVVIYGPARGATGTNT

>UniRef90\_Q39728

NHLLTGQRLTTGSFLTEGGFTFIMQSDCNLVLYDLNRPIWASGTYGKGTGCFLSMQSDG  
NLVVYDVRNIAIWASNTARNNGNYLLILQKDRNVVIYSQPIWATTTNHLLTGQRLTTGS  
FLTEGGFTFIMQSDCNLVLYDLNRPIWASGTYGKGTGCFLSMQSDGNLVVYDVRNIAIW  
ASNTARNNGNYLLILQKDRNVVIYSQPIWATTT

>UniRef90\_Q39729

LNAGQSLGTGGSALGGYIFKIQADCNLVLYDNNRAVWASGTNGRATDCILSMQRDGN  
LVIYSGSRVIWASNTNRQSGNYLILQRDRNVVIYDNSNNAIWATGTLNAGQSLGTGGS  
LALGGYIFKIQADCNLVLYDNNRAVWASGTNGRATDCILSMQRDGNLVIYSGSRVIWA  
SNTNRQSGNYLILQRDRNVVIYDNSNNAIWATGT

>UniRef90\_Q39903

NILYSGETLSAGEFLNQGNVVFIMQEDCNLVLYDVKPLWETNTGGLSRRCYLNMQTD  
GNLVVYNPSNKPIWASNTGGQNGNYVCILQKDGNIAYGPAIWATGTNILYSGETLSAG  
EFLNQGNVVFIMQEDCNLVLYDVKPLWETNTGGLSRRCYLNMQTDGNLVVYNPSNK  
PIWASNTGGQNGNYVCILQKDGNIAYGPAIWATGT

>UniRef90\_Q39904

ENVLYSGETLPTGGFLSSGSFVFIMQEDCNLVLYNVDKPIWATNTGGLSSDCTLNMQTD  
GNLVVYTPSNKPIWASNTDSQNGHYVCILQKDRNVVIYGTDRWATGTNTENVLYSGE  
LPTGGFLSSGSFVFIMQEDCNLVLYNVDKPIWATNTGGLSSDCTLNMQTDGNLVVYTPS  
NKPIWASNTDSQNGHYVCILQKDRNVVIYGTDRWATGTNT

>UniRef90\_Q40231

NLGGGERLNSGESLTEGACVFIMQEDCNLVLYESSRPTWASGSYHQSGCYVTLQND  
GNLVVYNNRNRAVWASDTVRENIGNVILILQKDHNVVLYSLPIWATGTNTLGGGERLN

SGESLTEGACVFIMQEDCNLVLYESSRPTWASGSYHQSGCYVTLQNDGNLVVYNNRN  
RAVWASDTVRENIGNVILILQKDHNVVLYSLPIWATGT

>UniRef90\_Q40233

NHLLGGERLNTGQSLTDGGNAFIMQEDCNLVLYESSRPTWASGTYHRGSGCYLAMQN  
DGNLVVYDNRNRRAIWASQTDRQNVGTVILILQKDHNVVLYTNPIWATGTNHLLGGERL  
NTGQSLTDGGNAFIMQEDCNLVLYESSRPTWASGTYHRGSGCYLAMQNNDGNLVVYDN  
RNRAIWASQTDRQNVGTVILILQKDHNVVLYTNPIWATGT

>UniRef90\_Q40417

NILYSGDTLSTGQFLSYGSYVFIMQEDCNLVLYDVKPIWATNTGGLSSDCHLSMQTDG  
NLVVYSPQNKAIWASNTDGENGHFVCILQKDRNVVIYGTDRWATGTNTNLYSGDTLST  
GQFLSYGSYVFIMQEDCNLVLYDVKPIWATNTGGLSSDCHLSMQTDGNLVVYSPQNK  
AIWASNTDGENGHFVCILQKDRNVVIYGTDRWATGTNT

>UniRef90\_Q41625

NVLYTGESLYGGQSLTWESYTFIMQTD CNLVLYEGNGSIWASGSNGLGSGCYVTMOKD  
GNLVIYSKIGNSVWASQTHQAEGNYVLVLQKDRNVVIYGSSLWATNTNVLYTGESLYG  
GQSLTWESYTFIMQTD CNLVLYEGNGSIWASGSNGLGSGCYVTMOKDGNLVIYSKIGNS  
VWASQTHQAEGNYVLVLQKDRNVVIYGSSLWATNT

>UniRef90\_Q4W660

NILHSGETLSPGEFLSYRSYXFIMQEDCNLVLYBIDKPIWATNTGGLSSGCHLSMQSDGN  
LVVYSPQNRPIWASDTGGQNDANYVLILQKDRNVVIYGPARTWATGTNTNILHSGETLSP  
GEFLSYRSYXFIMQEDCNLVLYBIDKPIWATNTGGLSSGCHLSMQSDGNLVVYSPQNRPI  
WASDTGGQNDANYVLILQKDRNVVIYGPARTWATGTNT

>UniRef90\_Q56V23

KSVLKSGESLAAGESLQYAQYILVMQGDCNLVLYANKVKVLWASRTNGKGAASCKL  
SMQNDGNLVIYAATTPVWASRTSRAFASYKLNQGDGNVVIYGPSGAIWATNTKSVLK  
SGESLAAGESLQYAQYILVMQGDCNLVLYANKVKVLWASRTNGKGAASCKLSMQN  
DGNLVIYAATTPVWASRTSRAFASYKLNQGDGNVVIYGPSGAIWATNT

>UniRef90\_Q5EER7

NSLTSPNSLPSGHSLNSDSYRLIMQGD CNFVLYDSGSPVWASNTGGLGSDCRLTLHNNG  
NLVIYDRGNNVIWETKTNGKDDHYVLVLQQDRNVVIYGPVWATGNSLSTSPNSLPSG  
HSLNSDSYRLIMQGD CNFVLYDSGSPVWASNTGGLGSDCRLTLHNNGNLVIYDRGNNV  
IWETKTNGKDDHYVLVLQQDRNVVIYGPVWATGS

>UniRef90\_Q5MK12

ENILYSGETLSPGDFLSYGSYVFIMQEDCNLVLYNVDKPIWATNTGGLSRDCHLSMQSD  
GNLVVYSRQNKPIWASDTGGENGNYVCVLQKDRNVVIYGTARWATGTENILYSGETLS  
PGDFLSYGSYVFIMQEDCNLVLYNVDKPIWATNTGGLSRDCHLSMQSDGNLVVYSRQN  
KPIWASDTGGENGNYVCVLQKDRNVVIYGTARWATGT

>UniRef90\_Q5W956

ILYSGDSLRSQSLTYASYNFIMQND CNLVQYDNGKAIWASGTNNGRSGCYCAMQSDG  
NLVVYTSSNKA V WASNTNVGNHGYVLILQKDRNVVIYGGARWATNTILYSGDSLRSQ  
SLTYASYNFIMQND CNLVQYDNGKAIWASGTNNGRSGCYCAMQSDGNLVVYTSSNKA  
V WASNTNVGNHGYVLILQKDRNVVIYGGARWATNT

>UniRef90\_Q679P2

RNVLVNNEGLYAGQSLVEEQYTFYMQDDCNLVLYEYSTPIWASNTGVTGKNGCRAVM  
QADGNFVVYDVKGRAVWASNSRRGNGNYILVLQKDRNVVIYGSDIWSTGTYYRRNVLV

NNEGLYAGQSLVEEQYTFYMQDDCNLVLYEYSTPIWASNTGVTGKNGCRAVMQADGN  
FVVYDVKGRAVWASNSRRGNGNYILVLQKDRNVVIYGSDIWSTGTyr

>UniRef90\_Q6JTD2

EDIMFNGESLSTNEFLENGPYRFIMQDDCNLVLYINRTRALWASGTNNGRGSNCRATLQN  
NGNLVVITGSDIVWSSNSSRGQNSYRLIVQSDGNVVIYGGALWATNTEDIMFNGESLST  
NEFLENGPYRFIMQDDCNLVLYINRTRALWASGTNNGRGSNCRATLQNNGNLVVITGSDI  
VWSSNSSRGQNSYRLIVQSDGNVVIYGGALWATNT

>UniRef90\_Q6SQE5

NVLYSGQALSTGASLSFAAYQFVMQADCNLVLYDNGNPVWASGTNNGRGSQCRCRMQ  
YDGNLVVYTSGNRAVWASNTNRGTGRYQCILQRDRNVVYDPQGRPIWATGTNVLYS  
GQALSTGASLSFAAYQFVMQADCNLVLYDNGNPVWASGTNNGRGSQCRCRMQYDGNL  
VVYTSGNRAVWASNTNRGTGRYQCILQRDRNVVYDPQGRPIWATGT

>UniRef90\_Q6V8L5

LNSNASLNTGDYLSVKAYKFIMQEDCNLVLYDAGTAIWSSGTYGRGYGCRCTMQDDG  
NLVVYNSRSEAVWSSRTYRAKGFYILVLQGDRNVVIYSRGAIIWSTGTYLNSNASLNT  
GDYLSVKAYKFIMQEDCNLVLYDAGTAIWSSGTYGRGYGCRCTMQDDGNLVVYNSRS  
EAVWSSRTYRAKGFYILVLQGDRNVVIYSRGAIIWSTGTy

>UniRef90\_Q6XCI6

NVLQSGQQLGTGGSLDYAAYNFRMQADCNLVLYDNGNAVWASGTNNGRGSCTCRMQ  
YDGNLVVYTNANRAVWASNTNRGTGSYQLILQRDRNVVIYDPSGRAIWATGTNVLQS  
GQQLGTGGSLDYAAYNFRMQADCNLVLYDNGNAVWASGTNNGRGSCTCRMQYDGN  
LVVYTNANRAVWASNTNRGTGSYQLILQRDRNVVIYDPSGRAIWATGT

>UniRef90\_Q7Y041

NILYSGETLSAGESLNYGPYTFIMQQDCNLVLYDVKPIWASNTGGLARGCHLSMQSD  
GNLVVYSPSGNRPIWASNTQGGENGYVCIVQKDRNVVIYGTARWATGTYTILYSGET  
LSAGESLNYGPYTFIMQQDCNLVLYDVKPIWASNTGGLARGCHLSMQSDGNLVVYSP  
SGNRPIWASNTQGGENGYVCIVQKDRNVVIYGTARWATGTy

>UniRef90\_Q7Y1W7

NILYSGETLSTGESFNYPYTFIMQEDCNLVLYDVKPIWASNTGGLARGCHLSMQSDG  
NLVVYTPSGNRPIWASNTQGGENGYVCILQKDRNVVIYGTARWATGTNILYSGETLSTG  
ESFNYPYTFIMQEDCNLVLYDVKPIWASNTGGLARGCHLSMQSDGNLVVYTPSGNR  
PIWASNTQGGENGYVCILQKDRNVVIYGTARWATGT

>UniRef90\_Q8H2A4

ENILYTNDVLFGGQSLTNGNFRFTMQTDCNLVLYDGGSAIWSSGTYRKGTGCYVKMQS  
DGNLVVYNGSNNALWASNTDRGRGNVVCILQRDRNVVYGPALWATGTENILYTNDV  
LFGGQSLTNGNFRFTMQTDCNLVLYDGGSAIWSSGTYRKGTGCYVKMQSDGNLVVYN  
GSNNALWASNTDRGRGNVVCILQRDRNVVYGPALWATGT

>UniRef90\_Q8L568

NSLSSPNSLFTGHSLEVGPSYRLIMPGDCNFVLYDSGKPVWASNTGGLGSGCRLTLHNN  
GNLVIYDQSNRVIWQTKNGKEDHYVLVLQQDRNVVIYGPVWATGSNSLSSPNSLFT  
GHSLEVGPSYRLIMPGDCNFVLYDSGKPVWASNTGGLGSGCRLTLHNNGNLVIYDQSN  
RVIWQTKNGKEDHYVLVLQQDRNVVIYGPVWATGS

>UniRef90\_Q8LK14

ILYSGETLSAGQSLNNGPYTFIMQEDCNLVLYNVDKPIWASNTGGLARGCHLSMQRDG  
NLVVYSQRNRPIWASNTGGHNAANYVLILQKDRNVVIYGPAKWATGTYTILYSGETLS



AGQSLNNGPYTFIMQEDCNLVLYNVDKPIWASNTGGLARGCHLSMQRDGNL VVYSQR  
NRPIWASNTGGHNAANYVLILQKDRNVVIYGPAKWATGTYT

>UniRef90\_Q945J7

ENILYSGETLPTGGFLTSGSFVFIMQQDCNLVLYNIDKPIWATNTGGLSSDCSLSMQTDG  
NLVVYNPSNKPIWASNTDGQNGNYVCILQKDRNVVIYGTNRWATGTENILYSGETLPTG  
GFLTSGSFVFIMQQDCNLVLYNIDKPIWATNTGGLSSDCSLSMQTDGNL VVYNPSNKPI  
WASNTDGQNGNYVCILQKDRNVVIYGTNRWATGT

## Double Domain

>1KJ1

RNLLTNGEGLYAGQSLDVEPYHFIMQEDCNLVLYDHSTSVWASNTGILGKKGCKAVLQ  
SDGNFVVYDAEGRSLWASHSVRGNNGNYVLVLQEDGNVVIYGSDIWSTGTYKRNILMN  
DEGLYAGQSLDVEPYHLIMQEDCNLVLYDHSTAVWTTNTDIPGKKGCKAVLQSDGNFV  
VYDAEGRSLWASHSVRGNNGNYVLVLQEDGNVVIYGSDIWSTNTYK

>UniRef90\_A2IB11

EQVLIANRTLYAGQSLYSMNRNYRFIMQWDCSLALYEFQKPLWISTTDRQPGTFCDATL  
DAGSARLAVTQRNTNKQVWSSTTSFYAFKYVLVLQTDLNVVIYSRPVWSTNTFRFIMQ  
DDCDLVLYDDDRRIWSSETSGKGTGCNAKLNGLTGQLIVRDNNGRIVWSSKNRAVPIK  
KHILLQPDNRNVVYVYTRVWASDT

>UniRef90\_A2ICN3

NYLLTGETLNTNEHLRNGDFDLVMQEDCNLVLYNGNWQSNTANRGKECKLTLTDRGE  
LLIQDRDGSNVWSSGSQSERGNAAAHLHPEGRLVIYGNMLFSGQILHNDGMLTARNHR  
LVMQEDCNLVLYGGKLGWQSNTHGNGEHCFLRLTHKGELIHKDDDFKTIWSSRSKSKQ  
GDYAFILQDDGFAVIYGPAIFSTGS

>UniRef90\_B1A014

NYLLSGQTLDTDGHLKNGDFDFVMQDDCNAVLYNGNWQSNTANRGRDCKLTLTDNG  
ELIINDGKGSTVWKSQSPSVRGNAAAHLHPEGRLVIYGPSVFNNMLFSGQVLHEDGRLT  
VKNHRLVMQGDCNLVLYGGKFGWQSNTHGNGEHCFLRLNHNKGELIHKDGDGFKTIWSS  
RTSSKQGEYVFILQDNGFGVVYGPAT

>UniRef90\_B5LYJ9

LLSGQTLDTGHLKNGDFDLVMQDDCNAVLYNGNWQSNTANNGRDCKLTLTDYGELV  
IKNGDGSTVWKSQAQSVKGNAAAHLHPEGRLVVLGNLLFSGQVLYGDGRLTAKNHQL  
VMQGDCNLVLYGGKYGWQSNTHGNGEHCFLRLNHNKGELIHKDDDFKTIWSSRSKSKQ  
EYVLILQDDGFGVIYGPAIFET

>UniRef90\_D4P965

NYLLSGQTLDTDGHLKNGDFDFVMQDDCNAVLYNGGWQSNTANKGRDCKLTLTDRG  
ELVINNGGGSTVWRSGSQSVKGNAAAHLHPEGKLVYGNMLFSGQVLYGDGKITARNH  
MLVMQGDCNLVLYGGKYGWQSNTHGNGEHCFLRLNHNKGELIHKDDDFKSIWSSQSSK  
QGDYVFILQDDGFAVIYGPAMWAT

>UniRef90\_E2ITD6

NHLLSGETLDTNGHLRNSDFDLIMQEDCNAVLYNGNWQSNTANKGRDCKLTLTDRGE  
LVIKNGDRSIVFRSGSQSDVRGNALVHPEGRLVIYGNMLFSGQVLYGDGKLRARNH  
MLVMQGDCNLVLYGGKYGWQSNTHGNGENCFVRLSHKGELIHKDDDFQTIWSSRSKSK  
QGDYVFILQEDGFAVIYGPAT

>UniRef90\_H1A7C5

NYLLSGETLGTQQLNYDKLSFVMQGDCNLVLYNGGWQSNTANRGKDCTVSLNNDG  
QLVIKSGDGKTVWTSQDSSPRGNAAAHLHPEGKVVVYGPVWSANLMFSGQVLYRDG  
KLTRDYMFVMQGDCNLVLYTHGGWQSNTHGNGQHCFRLDHRGMLTIKDDSYGT  
WTSQKSAEGEYVLILQEDAKVVVYGPAT

>UniRef90\_H8Y197

NHLLSGEILDNTNGHLRNGDFDLVMQEDCNAVLYNGNWQSNTANKGRDCKLTLTNRGE  
LIKNGDGSIVFRSGSQSERGDYALVHPEGKLVYGNMLFSGQVLHEDGRLTARNHKL

VMQGDCNLVLYGGKFGWQSNTHGNGDHCFLRLSHKGELIHKDDNFKTIWSSQSSSKQG  
DYVFILQENGFGVIYGPAIFET

>UniRef90\_P86626

DNNVLLTGDVIHTDNQLSYESA AFVMQGDCNLVLYNEAGGFQSNTHGRGVDCTLRNLN  
NRGQLEIHSANSNTPVWVYPRSVNTRVGNYYAATLGPDQHVTIYGPAIWSTPAAARNVL  
FSSQVMYDNAQLATRDYSLVMRDDCNLVLTKGSKTNIVWESGTSGRGQHCFMRLGHS  
GELDITDDRLNTV FVSNTV GQEGDYVLILQINGQAVVYGPAVWST

>UniRef90\_P92932

RNVLTGETLHAGEHLDIGQYTL SMRYDCNLVLYENSNPLWASNTQYEENVVCQVVLR  
KDGILVVS YVGSEADYPVWSSNDRLDSGN YALVLHEDGNLVIYGTDIWSTGTAKRSV  
LKSQEQLSSEQLNTQQFKLIAQEDCNLVL YEYNIVIWASNTVVG AHAGCRAAMQVDG  
NFVIYFNLHAIWSSHTDRENGNYVLVLQQDGNVVIYGPVWSTGT

>UniRef90\_Q2LAE3

NYLLSGETLDTNGHLRNGNFDLVMQEDCNAVL YNGGWQSNTANRGRDCKLSLTDYGE  
LVIKNGDGSTVWRSGSQSDKGKYAAVVHPDGRLVVIYGPSVFNMLFSEQVLYEDGRL  
TAKNHRLVMQGDCNLVLYGGKFGWQSNTHGNGEDCFVRLNHKGELVIKHDNFRTIWS  
SQQNSNEG DYVFILQDDGFGVIYGPAIWAT

>UniRef90\_Q38731

NYMLSGETLNTDGRLTNGELTLMQVDCNLVLYHGGWQSNTANNGRDCKLTLTDFGE  
LVIKSGTGSTVWSSGSKQSMKGN YAAVVHPEGRLVIYGNMLFSGQVLYGDGTL SARNH  
KLVMQGDCNMVLYGGKYGWQSNTHGNGKYCFAMLTHKGELVIRDDDFKSVWSSKSS  
SKQGDYVFILQDDSLAIYGPVVFSTGS

>UniRef90\_Q38787

RNLLTNGEGLYAGQSLNVEPYHFIMQEDCNLVL YDHSTAVWATNTDIPGKKECRAVLQ  
SDGNFVVYDADGRPLWASHSVRGNGNYVLVLQEDGNVVIYGS DIWSTGTYRNILRNDE  
GLYAGQSLDVEPYHFIMHEDCNLVL YDHSTAVWASNTDIPGKKGCKAVLQSDGNFVV  
YDAEGRSLWASHSVRGNGNYVLVLQEDGNVVIYGS DIWSTDTYR

>UniRef90\_Q6Q5X6

NYLLSGETLNTNGHLRNGDFDLVMQEDCNAVL YNGKWQSNTANKGRDCKLTLTNRGE  
LVIKNGDGSTVFSSGSQSDMRGN YALVVHPDGRLVIYGNMLFSGQVLYSDGMLVARN  
HRLVMQGDCNLVLYGGKFGWQSNTHGNGEHC FVRLNHKGELVIKDDNFQTIWSSRSSS  
AKQGDYVFILQDDGFGVTYGPVWST

>UniRef90\_Q9FVA1

NVLLTGDVLHTDNQLSFESA AFVMQGDCNLVLYNEAGGFQSNTHGRGVGCTLRNLNF  
GQLEIHSANSNTPVWVSLRNGIPVRGDYAAVLGPDQHVTIYGPAIWSTRNVLFSSQVMS  
DNAQLATRDYSLVMRDDCNLALTKGSKTNIVWESGTSGRGQHCFMRLGHTGLIEISDD  
RLNTVWRSNTV GQEGDYVLILQINGQAVVYGPAVWST
